# Supplementary figures and images for: D-Fructose Assimilation and Fermentation by Yeasts Belonging to Saccharomycetes: Rediscovery of Universal Phenotypes and Elucidation of Fructophilic Behaviors in Ambrosiozyma platypodis and Cyberlindnera americana
Source: MDPI journal article supplement (doi:10.3390/microorganisms9040758), 2021-04-05

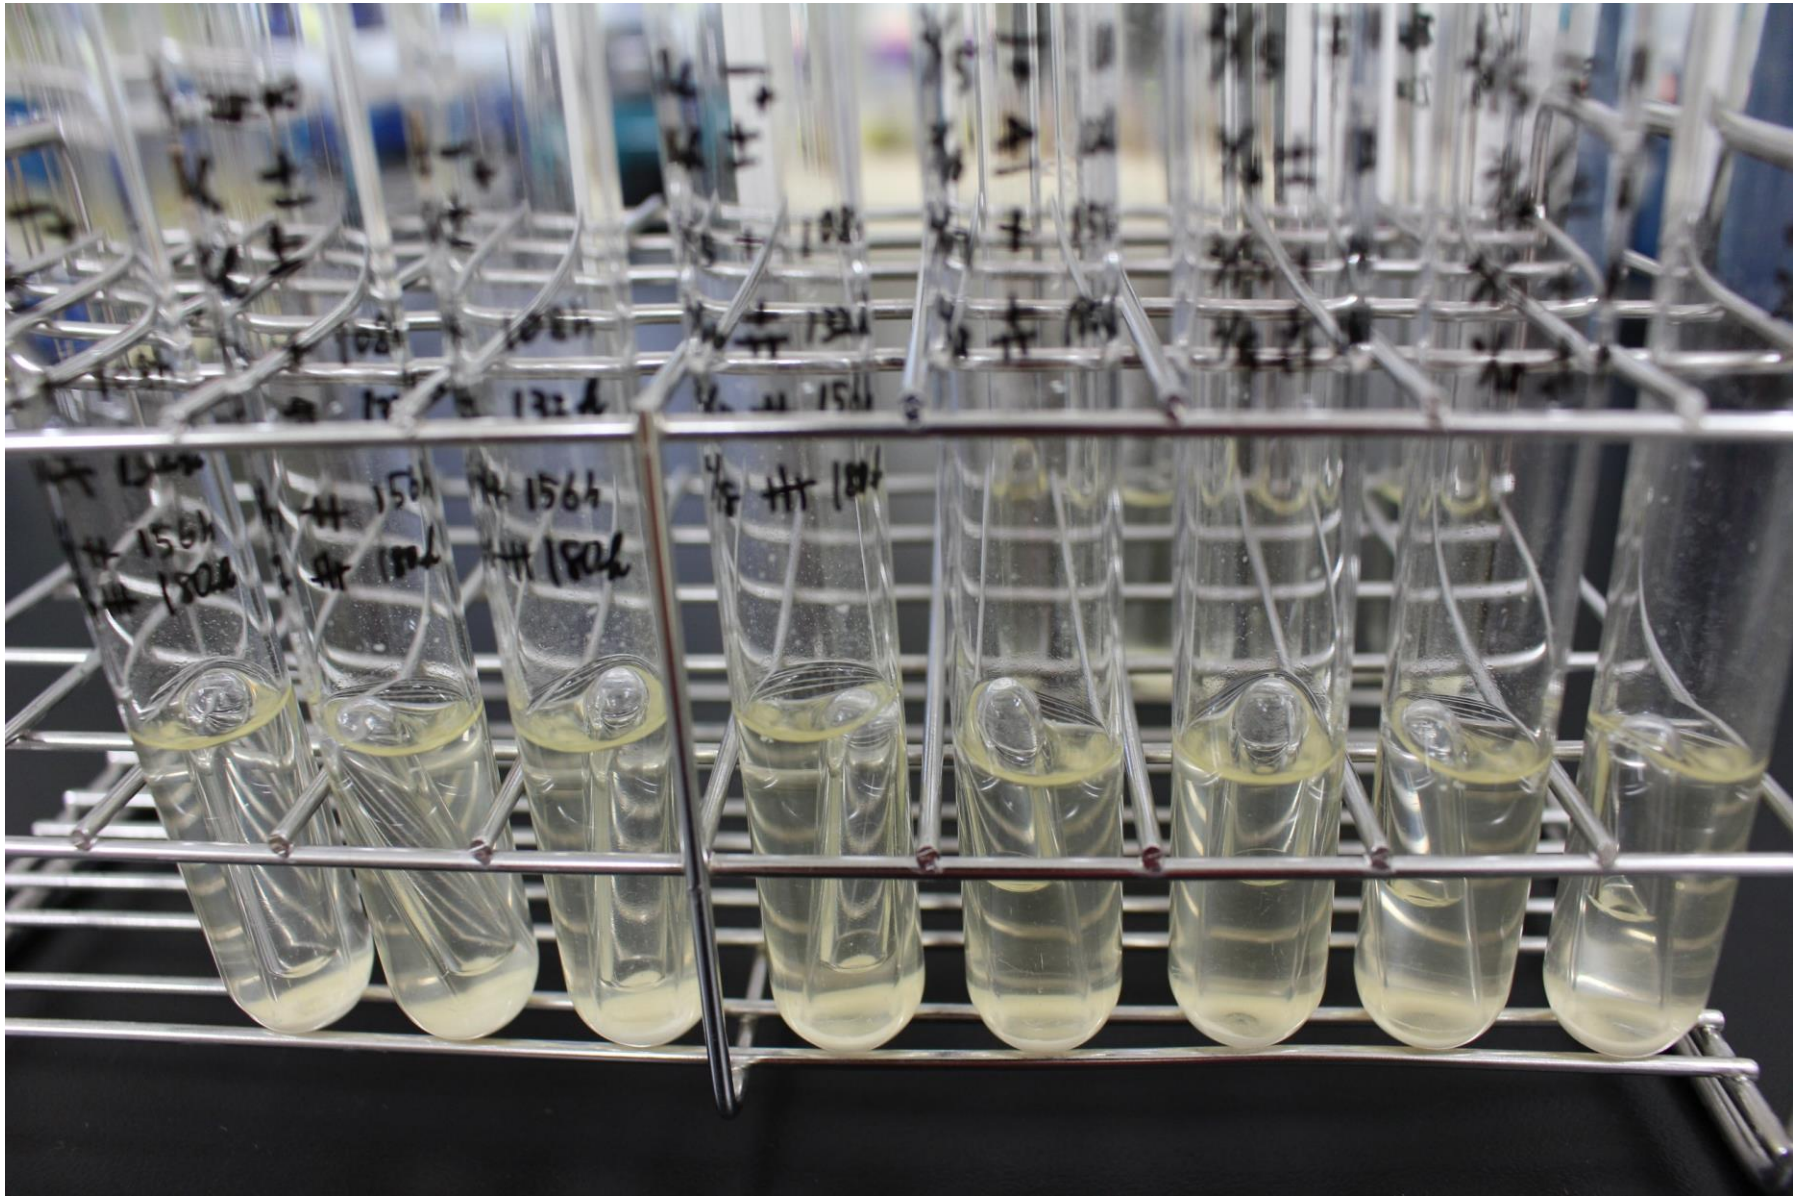

**Figure S1.** Gas filling in a Durham tube in the fermentation liquid medium.

Supplement: s1 [file s1]
